# Cch1p Mediates $\text{Ca}^{2+}$ Influx to Protect *Saccharomyces cerevisiae* against Eugenol Toxicity

Stephen K. Roberts<sup>1\*</sup>, Martin McAinsh<sup>2</sup>, Lisa Widdicks<sup>1</sup>

**1** Division of Biomedical and Life Sciences, Faculty of Health and Medicine, Lancaster University, Lancaster, United Kingdom, **2** Lancaster Environment Centre, Lancaster University, Lancaster, United Kingdom

## Abstract

Eugenol has antifungal activity and is recognised as having therapeutic potential. However, little is known of the cellular basis of its antifungal activity and a better understanding of eugenol tolerance should lead to better exploitation of eugenol in antifungal therapies. The model yeast, *Saccharomyces cerevisiae*, expressing apoaequorin was used to show that eugenol induces cytosolic  $\text{Ca}^{2+}$  elevations. We investigated the eugenol  $\text{Ca}^{2+}$  signature in further detail and show that exponentially growing cells exhibit  $\text{Ca}^{2+}$  elevation resulting exclusively from the influx of  $\text{Ca}^{2+}$  across the plasma membrane whereas in stationary growth phase cells  $\text{Ca}^{2+}$  influx from intracellular and extracellular sources contribute to the eugenol-induced  $\text{Ca}^{2+}$  elevation.  $\text{Ca}^{2+}$  channel deletion yeast mutants were used to identify the pathways mediating  $\text{Ca}^{2+}$  influx; intracellular  $\text{Ca}^{2+}$  release was mediated by the vacuolar  $\text{Ca}^{2+}$  channel, Yvc1p, whereas the  $\text{Ca}^{2+}$  influx across the plasma membrane could be resolved into Cch1p-dependent and Cch1p-independent pathways. We show that the growth of yeast devoid of the plasma membrane  $\text{Ca}^{2+}$  channel, Cch1p, was hypersensitive to eugenol and that this correlated with reduced  $\text{Ca}^{2+}$  elevations. Taken together, these results indicate that a cch1p-mediated  $\text{Ca}^{2+}$  influx is part of an intracellular signal which protects against eugenol toxicity. This study provides fresh insight into the mechanisms employed by fungi to tolerate eugenol toxicity which should lead to better exploitation of eugenol in antifungal therapies.

**Citation:** Roberts SK, McAinsh M, Widdicks L (2012) Cch1p Mediates  $\text{Ca}^{2+}$  Influx to Protect *Saccharomyces cerevisiae* against Eugenol Toxicity. PLoS ONE 7(9): e43989. doi:10.1371/journal.pone.0043989

**Editor:** Alexander G. Obukhov, Indiana University School of Medicine, United States of America

**Received:** June 14, 2012; **Accepted:** July 27, 2012; **Published:** September 13, 2012

**Copyright:** © 2012 Roberts et al. This is an open-access article distributed under the terms of the Creative Commons Attribution License, which permits unrestricted use, distribution, and reproduction in any medium, provided the original author and source are credited.

**Funding:** The authors have no support or funding to report.

**Competing Interests:** The authors have declared that no competing interests exist.

\* E-mail: s.k.roberts@lancaster.ac.uk

## Introduction

Fungi are emerging as major causes of human infections, particularly amongst a growing population of immunocompromised hosts, which is having significant economic and social impacts [1]. Our current situation is exacerbated by the limited number of antifungal drugs and the increasing incidence of resistance to (and failure of) antifungal treatments [1]. It is widely accepted that new therapeutic strategies are required.

Plant essential oils have been widely documented to possess broad spectrum antifungal properties and are generally recognised as safe for human and animal consumption [2]. Although plant essential oils have a complex chemical composition, phenolic compounds such as eugenol (the major constituent of essential oils from clove, cinnamon, and bay leaves), carvacrol (major constituent in oregano oil) and thymol (major constituent in thyme oil) have been identified as primary antimycotic components of essential oils and are recognised as having therapeutic potential [2,3]. Possible modes of action to explain the antifungal capacity of these compounds have been suggested, including general disruption of membrane integrity and consequential disruption of cell signalling and leakage of cell contents [4]; however, the mechanism of killing is not clear and consequently we know nothing about the mechanisms employed by fungi to resist the antifungal properties of plant essential oils. Recently, Rao et al. [5] showed that a variety of phenolic compounds derived from plant essential oils induced cytosolic  $\text{Ca}^{2+}$  ( $\text{Ca}^{2+}_{\text{cyt}}$ ) elevation in the

model yeast, *Saccharomyces cerevisiae*. The authors specifically focussed on carvacrol and showed that this phenolic compound disrupted ion ( $\text{Ca}^{2+}$  and  $\text{H}^+$ ) homeostasis and induced transcriptional changes indicative of  $\text{Ca}^{2+}$  stress, raising the possibility that the antifungal activity of carvacrol depended, at least in part, on a toxic elevation of  $\text{Ca}^{2+}$ . However, despite these new insights, it remains unclear if the  $\text{Ca}^{2+}_{\text{cyt}}$  elevation induced by these plant phenolic compounds represents an antifungal activity or if it forms part of signalling response to protect against the fungicidal activity.

In the present study, we monitored aequorin luminescence to investigate the effects of eugenol on  $\text{Ca}^{2+}$  homeostasis of *S. cerevisiae* to gain insights into the mechanisms mediating its antifungal activity. We focussed on the role of the  $\text{Ca}^{2+}$  channels, Cch1p, Mid1p and Yvc1p and show that eugenol-induced  $\text{Ca}^{2+}_{\text{cyt}}$  elevations are dependent on Cch1p-mediated  $\text{Ca}^{2+}$  influx. Furthermore, in contrast to that proposed for carvacrol, eugenol-induced  $\text{Ca}^{2+}_{\text{cyt}}$  elevations do not appear to serve as a cytotoxic  $\text{Ca}^{2+}$  burst but instead are part of a signalling pathway which protects yeast against eugenol stress.

## Materials and Methods

### Strains and media

Single and double *mid1Δ* and *cch1Δ* mutants were derived from the parental *Saccharomyces cerevisiae* strain JK9-3da (Mata, leu2-3, 112, his4, trp1, ura 3–52, rme1, HMLa) by replacing the MID1 and CCH1 genes by a KanMX cassette [6]. *yvc1Δ* mutant was

derived from the parental strain *S. cerevisiae* strain BY4742 (Mat $\alpha$ , his3 $\Delta$ 1, leu 2 $\Delta$ 0, lys2 $\Delta$ 0, ura3 $\Delta$ ) by replacing YVC1 gene by a KanMX cassette (EUROSCARF strain Y11863). Unless otherwise stated, yeast strains were cultured at 30°C in standard synthetic complete media (SCM; Formedium, UK) or, for strains transformed with pEVP11/AEQ, SCM minus the addition of leucine (SCM-leu). All growth media contained 2% (w/v) glucose.

### Ca<sup>2+</sup>-dependent aequorin luminometry

Yeast strains were transformed with pEVP11/AEQ (a plasmid bearing apoaequorin gene and a LEU2 marker, generously provided by Dr Patrick Masson, University of Wisconsin-Madison, Wisconsin, US) as previously described [7]. To obtain cells in stationary growth phase, *S. cerevisiae* strains expressing apoaequorin were grown overnight in SCM-leu in a shaking (150 rpm) incubator to optical density at 600 nm (OD<sub>600</sub>) of 8 (1 × 10<sup>8</sup> cells/ml). OD<sub>600</sub> was determined after 1:8 dilution of culture in water. To obtain cells in mid-logarithmic growth phase, 0.5 ml of stationary phase cells from overnight cultures were sub-cultured into 10 ml of fresh SCM-leu to give an OD<sub>600</sub> of 0.8 and incubated at 30°C, shaking at 150 rpm for 4 to 5 hours until OD<sub>600</sub> between 2.4 and 3.2 was reached. Cells were pelleted using a microcentrifuge and resuspended in fresh SCM-leu to an OD<sub>600</sub> of 8.

Luminometry measurements were conducted as previously described [8]. Briefly, 20  $\mu$ l of yeast cells (at 1 × 10<sup>8</sup> cells/ml) transformed with pEVP11/AEQ were incubated with 0.5  $\mu$ l of 0.5 mM coelentraine (prolume, USA) in absolute methanol for 20 minutes in order to reconstitute functional aequorin with in the cells. After incubation, the base line luminescence was recorded every 0.2 seconds for 40 seconds (unless otherwise stated) using a digital chemiluminometer (Electron Tubes Ltd., UK). At 40 seconds, 200  $\mu$ l of eugenol containing media was carefully added using a 1 ml syringe connected to a hypodermic needle. Luminescence (expressed in arbitrary units (AU) per 0.2 seconds) was measured for up to eight minutes after which cells were lysed with 1.6 M CaCl<sub>2</sub> in 20% (v/v) ethanol to determine total (summed) luminescence. Comparing total luminescence indicated that aequorin production was similar in the strains used in the present study (data not shown), however, as previously reported by [9], total luminescence was greater (approximately two-fold) in logarithmically growing cells compared to stationary growth phase cells. Furthermore, total luminescence was in significant excess over luminescence induced by eugenol indicating that the availability of aequorin-coelentraine complex was sufficient for the reporting of eugenol-induced Ca<sup>2+</sup><sub>cyt</sub> elevations. Samples were treated with coelentraine sequentially maintaining a constant time of incubation before addition of eugenol. Eugenol (Sigma-Aldrich) was in liquid form (density 1.06 g/ml) and was made to 100× stocks in absolute ethanol and stored at 4°C. Eugenol was added to samples at indicated concentrations (containing 1% ethanol) in either SCM-leu (which contained 2% w/v glucose) or EGTA buffer (25 mM Na<sub>2</sub>EGTA, 10 mM HEPES, pH 7.4, 2% w/v glucose).

### Yeast toxicity Assays

Growth assays in liquid culture were conducted as follows: yeast strains were cultured overnight to OD<sub>600</sub> of 8. 0.25 ml of cells were added to 5 ml of SCM (containing varying concentrations of eugenol and 1% ethanol) to a final OD<sub>600</sub> of approximately 0.5 (6.6 × 10<sup>6</sup> cells/ml). Cells were then incubated at 30°C shaking at 150 rpm. Controls contained 1% ethanol (solvent). At the time points indicated, aliquots were removed and OD<sub>600</sub> determined.

For drop assays, yeast strains were grown overnight at 30°C in SCM to OD<sub>600</sub> of 8, centrifuged, washed in 10 ml of sterile water and resuspended to 0.5 × 10<sup>8</sup> cells/ml. Following 10-fold serial dilutions of each yeast suspension using sterile water, 5  $\mu$ l drops were spotted on to SCM media (with varying concentrations of eugenol and 1% ethanol) containing 2% agar. Plates were incubated at 30°C.

## Results and Discussion

Rao et al. [5] showed that phenolic compounds from plant essential oils induce Ca<sup>2+</sup><sub>cyt</sub> elevations in *S. cerevisiae*. CCH1 and MID1 have been shown to encode subunits of a high affinity Ca<sup>2+</sup> channel located in the yeast plasma membrane [10,6,11,12]. Thus we explored the possibility that Cch1p and Mid1p mediated eugenol induced Ca<sup>2+</sup> influx across the plasma membrane using Ca<sup>2+</sup> channel mutant yeast strains transformed with pEVP11/AEQ [8] resulting in cytosolic expression of the Ca<sup>2+</sup>-sensitive bioluminescent protein aequorin. It has been recently shown that Ca<sup>2+</sup> channel activity is dependent on the metabolic state of yeast cells [9,13,14] and thus Ca<sup>2+</sup>-dependent luminescence was monitored in cells in mid-logarithmic growth phase and in stationary growth phase.

### Eugenol-induced Ca<sup>2+</sup><sub>cyt</sub> elevations in mid-logarithmic growth phase cells

Figure 1 shows representative traces of Ca<sup>2+</sup>-dependent luminescence in exponentially growing JK9-3da cells in response to increasing concentrations of extracellular eugenol. At concentrations greater than 0.4 mg/ml, eugenol induced a biphasic elevation in Ca<sup>2+</sup><sub>cyt</sub>: a rapid transient increase in Ca<sup>2+</sup><sub>cyt</sub> is immediately elicited by eugenol followed by a more sustained increase in Ca<sup>2+</sup><sub>cyt</sub> which lasted several minutes, peaking at approximately 220 seconds. Elevations in Ca<sup>2+</sup><sub>cyt</sub> were difficult to resolve at concentrations less than 0.6 mg/ml, when recording luminescence every 0.2 seconds. However increasing the period over which the luminescence counts were integrated from 0.2 seconds to 2 seconds improved resolution and Ca<sup>2+</sup><sub>cyt</sub> elevations following addition of 0.4 mg/ml eugenol were consistently observed (n = 5) while increases in luminescence following addition of 0.2 mg/ml eugenol were not apparent (Figure 1 inset). A biphasic elevation in Ca<sup>2+</sup><sub>cyt</sub> in *S. cerevisiae* has also been reported in response to amiodarone [15]. In contrast, Rao et al. [5] reported a single Ca<sup>2+</sup> peak in *S. cerevisiae* in response to carvacrol (0.0125–0.05 mg/ml), thymol (0.5 mg/ml) and eugenol (0.5 mg/ml) however, their recordings were limited to 80 seconds duration and therefore the biphasic nature of the response observed in the present study would not have been detected.

In a bid to understand the contribution of extracellular and intracellular sources of Ca<sup>2+</sup> in the eugenol response, Figure 2 shows average ( $\pm$  SEM) response of Ca<sup>2+</sup><sub>cyt</sub> following the application of 0.6 mg/ml eugenol in presence (i.e. SCM which contains approximately 0.1 mM Ca<sup>2+</sup>) and absence (i.e. EGTA buffer which is nominally Ca<sup>2+</sup> free) of extracellular Ca<sup>2+</sup>. In the absence of extracellular Ca<sup>2+</sup> no significant increase in Ca<sup>2+</sup><sub>cyt</sub> was detectable in the yeast strains tested indicating that the eugenol-induced Ca<sup>2+</sup><sub>cyt</sub> elevations resulted exclusively from an influx of Ca<sup>2+</sup> across the plasma membrane. Interestingly, the eugenol-induced increase in Ca<sup>2+</sup><sub>cyt</sub> in yeast mutants devoid of cch1p (Figures 2B and D) was different to that in the parental and mid1 $\Delta$  strains (Figures 2A and C) in that the transient increase in Ca<sup>2+</sup><sub>cyt</sub> which immediately follows the addition of eugenol was largely absent in mutant strains devoid of Cch1p. These results reveal that the eugenol-induced Ca<sup>2+</sup><sub>cyt</sub> elevation have two components; a

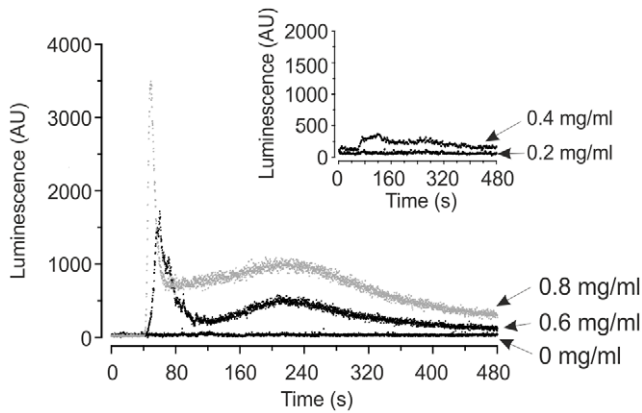

**Figure 1. Eugenol  $\text{Ca}^{2+}$  signal in mid-log growth phase cells.** Representative traces showing response of  $\text{Ca}^{2+}$ -dependent aequorin luminescence in JK9-3da cells in mid-logarithmic growth phase to increasing concentrations of eugenol suspended in SCM-leu. Eugenol was added at 40 seconds. Luminescence was recorded every 0.2 second and is expressed in arbitrary units (AU). Inset: As main figure but with  $\text{Ca}^{2+}$ -dependent luminescence recorded every 2 seconds. doi:10.1371/journal.pone.0043989.g001

*cch1p*-dependent  $\text{Ca}^{2+}$  influx which is activated immediately after addition of eugenol and a *cch1p*-independent  $\text{Ca}^{2+}$  influx which exhibits a delayed and more sustained activity lasting several minutes. This is consistent with the proposal that there are functionally redundant  $\text{Ca}^{2+}$  entry pathways in *S. cerevisiae* that remain to be identified [16]. It is also noteworthy that the eugenol-induced *cch1p*-dependent  $\text{Ca}^{2+}_{\text{cyt}}$  increase in *mid1Δ* cells was reduced compared to the parental strain. The first peak of the amiodarone-induced  $\text{Ca}^{2+}$  elevation has also been shown to originate from  $\text{Ca}^{2+}$  influx across the plasma membrane, although there are contrasting reports as to the influx pathways involved and the effects of *cch1Δ* and *mid1Δ* on the  $\text{Ca}^{2+}_{\text{cyt}}$  increase [13,15,17], whilst the second peak is predominantly derived from  $\text{Ca}^{2+}$  influx from the vacuolar store via the TRP-like  $\text{Ca}^{2+}$  channel Yvc1p [15,18]. Taken together, our results are consistent with the notion that eugenol activates Cch1p to elicit a  $\text{Ca}^{2+}$  influx across the plasma membrane and that Mid1p is necessary for optimal Cch1p activity.

### Eugenol-induced $\text{Ca}^{2+}_{\text{cyt}}$ elevations in stationary growth phase cells

Previous reports have highlighted that  $\text{Ca}^{2+}$  signatures are dependent on the growth phase of yeast cells [9,13,14] and therefore we investigated eugenol-induced  $\text{Ca}^{2+}_{\text{cyt}}$  elevations in stationary growth phase cells. Figure 3 shows that the eugenol-induced  $\text{Ca}^{2+}$  elevation in stationary phase cells was distinct to that exhibited by mid-logarithmic growth phase cells (Figure 2); specifically, stationary phase cells exhibited only one discernible phase which peaked within 120 seconds (in a concentration-dependent manner) and the magnitude of the  $\text{Ca}^{2+}_{\text{cyt}}$  elevation was up to 10-fold greater. Eugenol-induced increases in  $\text{Ca}^{2+}$ -dependent luminescence were detectable in stationary growth phase cells at eugenol concentrations of 0.4 mg/ml and above (Figure 3B). We investigated the eugenol-induced  $\text{Ca}^{2+}$  responses in further detail and average ( $\pm$ SEM) responses to 0.6 mg/ml eugenol are shown in Figure 4. In the absence of extracellular  $\text{Ca}^{2+}$ , the eugenol-induced  $\text{Ca}^{2+}_{\text{cyt}}$  elevations in the parental strain (JK9-3da) were reduced by approximately 65% indicating that, in contrast to cells in mid-logarithmic growth phase, eugenol induces  $\text{Ca}^{2+}$  influx from both extracellular and intracellular sources (Figure 4A). However, extracellular  $\text{Ca}^{2+}$  influx was significantly

reduced and  $\text{Ca}^{2+}$  release from intracellular stores was completely abolished in *cch1Δ* cells (Figure 4B). These results indicated that CCH1 was necessary for  $\text{Ca}^{2+}$  influx across the plasma membrane and influenced  $\text{Ca}^{2+}$  release from intracellular stores. It has been previously reported that deletion of CCH1 reduces the intracellular  $\text{Ca}^{2+}$  content in yeast and as a result, exhibit reduced intracellular  $\text{Ca}^{2+}$  release in response to hyperosmotic shock [9]; this is consistent with the notion that Cch1p functions to replenish intracellular stores [11,19,12]. We investigated the possibility that the absence of eugenol-induced  $\text{Ca}^{2+}$  release from intracellular stores in *cch1Δ* mutants also resulted from an inability to maintain intracellular  $\text{Ca}^{2+}$ . JK9-3da and *cch1Δ* yeast strains were cultured in SCM-leu supplemented with 10 mM  $\text{CaCl}_2$  to promote accumulation of intracellular  $\text{Ca}^{2+}$ . The  $\text{Ca}^{2+}$ -replete cells of wild type and *cch1Δ* strains exhibited significantly greater (approximately 4-fold) release of intracellular  $\text{Ca}^{2+}$  following addition of eugenol (Figures 4A and B) indicating that Cch1p is necessary to maintain intracellular  $\text{Ca}^{2+}$  stores in the absence of high extracellular  $\text{Ca}^{2+}$ . Interestingly the eugenol-induced intracellular  $\text{Ca}^{2+}$  release from *mid1Δ* and *cch1Δmid1Δ* strains (Figures 4 C and D) was comparable to the wild type strain suggesting that in the absence of Mid1p, yeast may employ mechanisms to maintain intracellular  $\text{Ca}^{2+}$  stores independently of Cch1p. Indeed, Mid1p has been proposed to act in sensing intracellular  $\text{Ca}^{2+}$  and couple Cch1p activity to intracellular  $\text{Ca}^{2+}$  content [12]; thus it is tempting to speculate that *mid1Δ* yeast adopt alternative (hitherto unidentified) pathways to maintain intracellular  $\text{Ca}^{2+}$ .

To investigate the origin of the eugenol-induced intracellular  $\text{Ca}^{2+}$  release, the *yvc1Δ* mutant and the isogenic parental strain (BY4742) were transformed with pEVP11/AEQ. Yvc1p is a TRP-like  $\text{Ca}^{2+}$  release channel [18] that mediates  $\text{Ca}^{2+}$  influx from the vacuole in response to osmotic shock [20]. Figure 5 shows the average ( $\pm$ SEM) eugenol-induced  $\text{Ca}^{2+}_{\text{cyt}}$  elevations in *yvc1Δ* and BY4742 (the isogenic parental strain) cells in stationary growth phase. Surprisingly, the magnitude of the eugenol-induced  $\text{Ca}^{2+}_{\text{cyt}}$  elevations in BY4742 cells was similar in both the absence and presence of extracellular  $\text{Ca}^{2+}$  (compare Figures 5A and B) indicating that, in contrast to the JK9-3da strain, intracellular release of  $\text{Ca}^{2+}$  is the major component of the eugenol response in stationary BY4742 cells. Consistent with this, eugenol-induced  $\text{Ca}^{2+}_{\text{cyt}}$  elevations in *yvc1Δ* cells were small in the presence of extracellular  $\text{Ca}^{2+}$  (Figure 5A) and completely abolished in EGTA buffer (Figure 5B). However, despite the relatively small contribution of the extracellular component of the  $\text{Ca}^{2+}$  signal in BY4742 cells, it is noteworthy that the  $\text{Ca}^{2+}$  influx across the membrane is evident in that the onset of the  $\text{Ca}^{2+}$  increase is earlier and increases more rapidly in the presence of extracellular  $\text{Ca}^{2+}$  (Figure 5A) compared to that in the absence of extracellular  $\text{Ca}^{2+}$  (Figure 5B). As expected, overnight culture in SCM-leu supplemented with 10 mM  $\text{CaCl}_2$  resulted in enhanced eugenol-induced intracellular  $\text{Ca}^{2+}$  release in the parental strain (BY4742) but was absent in the *yvc1Δ* mutant (Figure 6C). Taken together, these results show that eugenol activates Yvc1p to mediate  $\text{Ca}^{2+}$  release from the vacuole in stationary cells.

The differences in the  $\text{Ca}^{2+}$  response to eugenol between stationary growth phase yeast and logarithmically growing yeast are interesting and most likely reflect differences in  $\text{Ca}^{2+}$  channel activity as a result of the cells being in different metabolic states. This is consistent with previous reports. For example, the absence of Yvc1p activation (in response to osmotic shock) has been previously reported in logarithmically growing yeast cells [9] and the magnitude and the temporal kinetics of the  $\text{Ca}^{2+}_{\text{cyt}}$  elevation in response to amiodarone are reduced in stationary phase cells compared to that exhibited in actively growing cells [13].

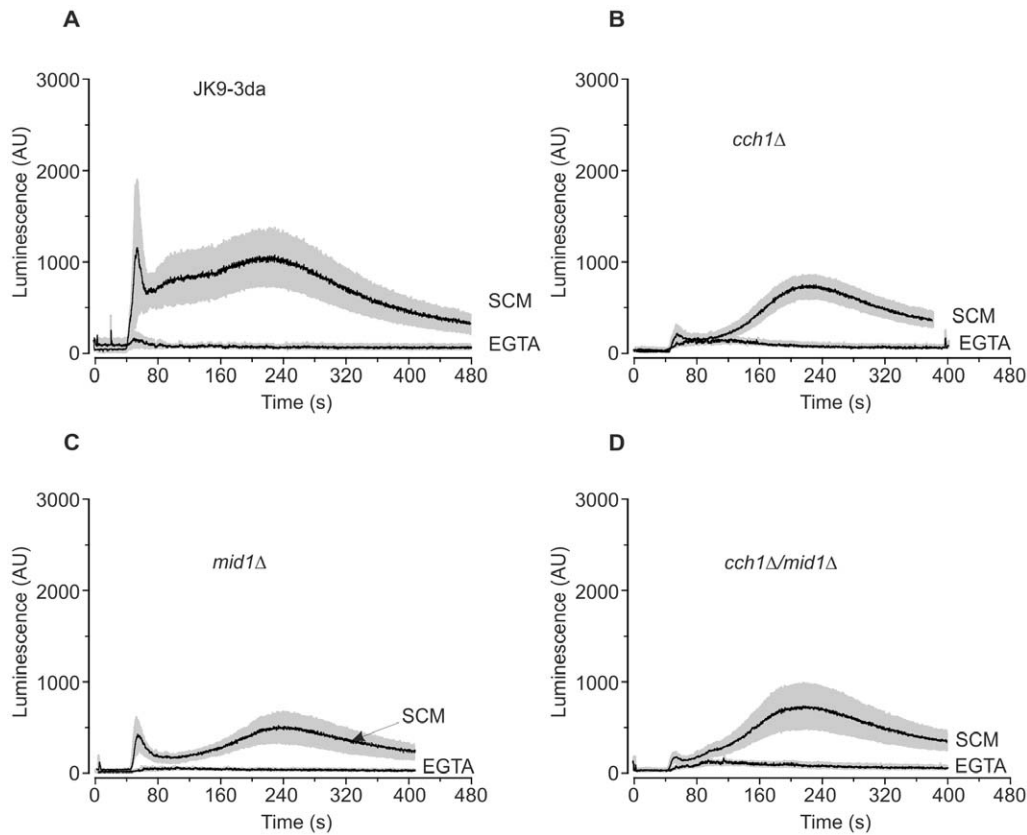

**Figure 2. Eugenol induces  $\text{Ca}^{2+}$  influx across the plasma membrane in mid-log cells.**  $\text{Ca}^{2+}$ -dependent aequorin luminescence from JK9-3da (A), *cch1Δ* (B), *mid1Δ* (C) and *cch1Δmid1Δ* (D) cells in mid-logarithmic growth phase in response to 0.6 mg/ml eugenol. Eugenol was added at 40 seconds and was suspended in either SCM-leu (SCM) or EGTA buffer (EGTA). Traces represent mean ( $\pm$  SEM) from at least 5 independent experiments. SEM values are illustrated using grey shading. Luminescence was recorded every 0.2 seconds and is expressed in arbitrary units (AU). doi:10.1371/journal.pone.0043989.g002

### Eugenol toxicity assays

To distinguish between the possibilities that  $\text{Ca}^{2+}$  influx and  $\text{Ca}^{2+}_{\text{cyt}}$  elevation are necessary for eugenol antifungal activity or form part of a tolerance mechanism we examined the growth of

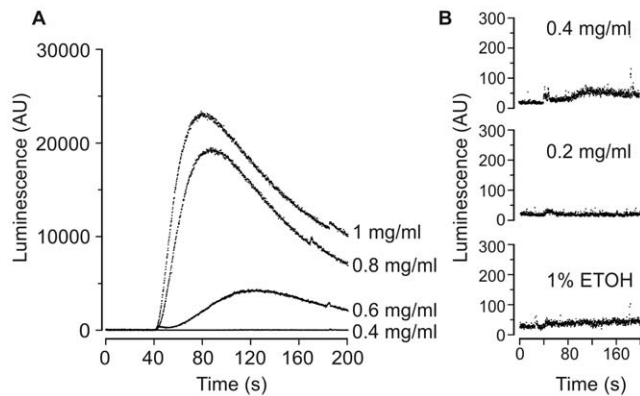

**Figure 3. Eugenol  $\text{Ca}^{2+}$  signal in stationary growth phase cells.** A) Representative traces showing response of  $\text{Ca}^{2+}$ -dependent aequorin luminescence in JK9-3da cells in stationary growth phase to increasing concentrations of eugenol suspended in SCM-leu. Eugenol was added at 40 seconds. Luminescence was recorded every 0.2 second and is expressed in arbitrary units (AU). B) data from the same experiment shown in part A but expressed on an expanded y-axis scale. doi:10.1371/journal.pone.0043989.g003

*cch1Δ* and *mid1Δ* single and *cch1Δmid1Δ* double mutants in increasing concentrations of eugenol (Figure 6). As shown in Figures 6A to D, the growth of *cch1Δ* and *cch1Δmid1Δ* strains in liquid SCM (characterised by doubling times of 7.87 and 5.63 hours respectively in the presence of 0.2 mg/ml eugenol) was more sensitive to eugenol relative to that for the isogenic parental strain (doubling time of 2.63 hours in 0.2 mg/ml eugenol). Although the growth of the *mid1Δ* strain (doubling time of 4.26 hours in 0.2 mg/ml eugenol) was marginally more sensitive to eugenol compared to the parental strain, inhibition of *mid1Δ* growth was less than that exhibited by yeast strains devoid of Cch1p. The hypersensitivity of the *cch1Δ* and *cch1Δmid1Δ* mutant strains to eugenol could be also clearly demonstrated in drop assays on solid SCM (Figure 6E). The drop assay also confirmed that the *mid1Δ* mutant strain was more tolerant to eugenol than the strains devoid of Cch1p. Taken together these results indicated that Cch1p-mediated  $\text{Ca}^{2+}$  influx is most likely part of a  $\text{Ca}^{2+}$ -dependent signal which protects against the toxic effects of eugenol. Interestingly, the growth of the *ycv1Δ* mutant was equivalent to its isogenic parental strain, BY4742 (Figure 1E) indicating that the  $\text{Ca}^{2+}$  influx from intracellular stores was not involved in the response of yeast to eugenol.

Figure 6 also indicates Cch1p activity in the absence of Mid1p. It has been well documented that CCH1 and MID1 are necessary for yeast survival in response to ion stress and azole class antifungals [12,19,21,22,23]; in these studies, *mid1Δ* and *cch1Δ* single and double mutants displayed the same phenotype and

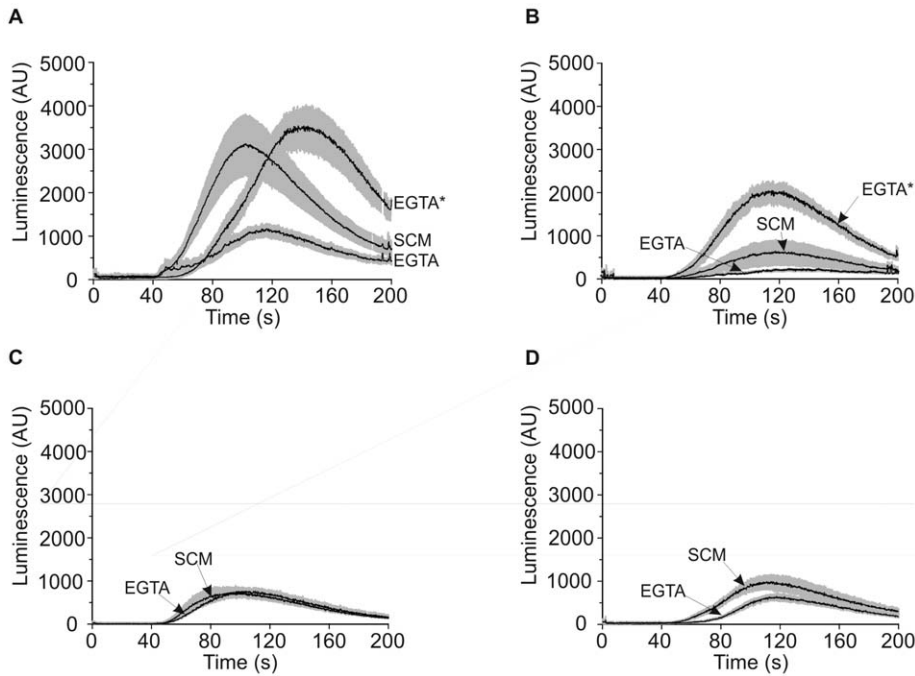

**Figure 4. Eugenol induces  $\text{Ca}^{2+}$  influx from intracellular and extracellular  $\text{Ca}^{2+}$  sources in stationary phase cells.**  $\text{Ca}^{2+}$ -dependent aequorin luminescence from JK9-3da (A), *cch1Δ* (B), *mid1Δ* (C) and *cch1Δmid1Δ* (D) cells in stationary growth phase in response to 0.6 mg/ml eugenol. Eugenol was added at 40 seconds and was suspended in either SCM-leu (SCM) or EGTA buffer (EGTA). EGTA\* represents luminescence from JK9-3da and *cch1Δ* cells cultured overnight in SCM-leu supplemented with 10 mM  $\text{CaCl}_2$ . Traces represent mean ( $\pm$  SEM) from at least 4 independent experiments. SEM values are illustrated using grey shading. Luminescence was recorded every 0.2 seconds and is expressed in arbitrary units (AU). doi:10.1371/journal.pone.0043989.g004

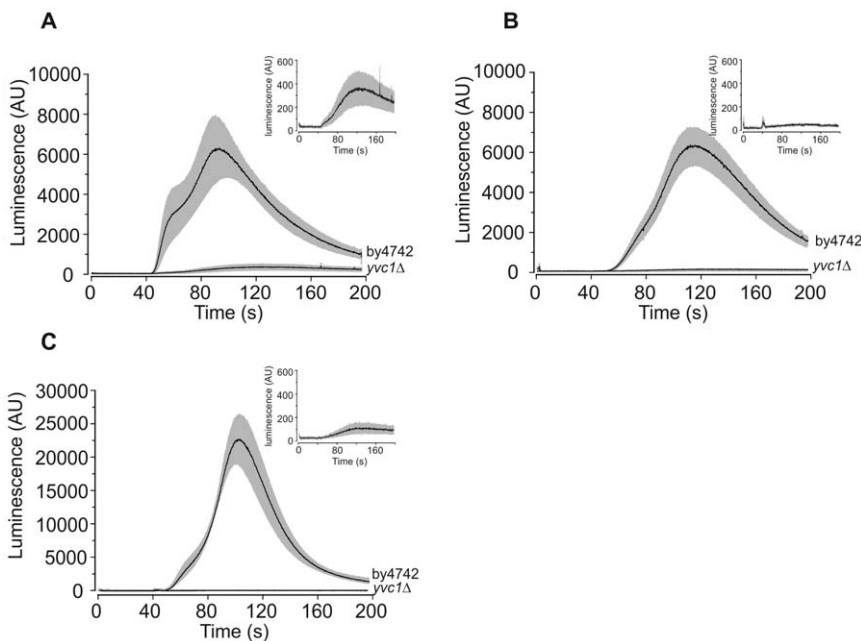

**Figure 5. Yvc1p mediates intracellular  $\text{Ca}^{2+}$  release from stationary phase cells.**  $\text{Ca}^{2+}$ -dependent aequorin luminescence from BY4742 and *yvc1Δ* cells in stationary growth phase in response to 0.6 mg/ml eugenol. Eugenol was added at 40 seconds and was suspended in either SCM-leu (A) or EGTA buffer (B). Traces represent mean ( $\pm$  SEM) from at least 4 independent experiments. SEM values are illustrated using grey shading. Luminescence was recorded every 0.2 seconds and is expressed in arbitrary units (AU). Inset shows data for *yvc1Δ* cells except expressed on an expanded y-axis scale. C) As part (B) except cells were cultured overnight in SCM-leu supplemented with 10 mM  $\text{CaCl}_2$ . doi:10.1371/journal.pone.0043989.g005

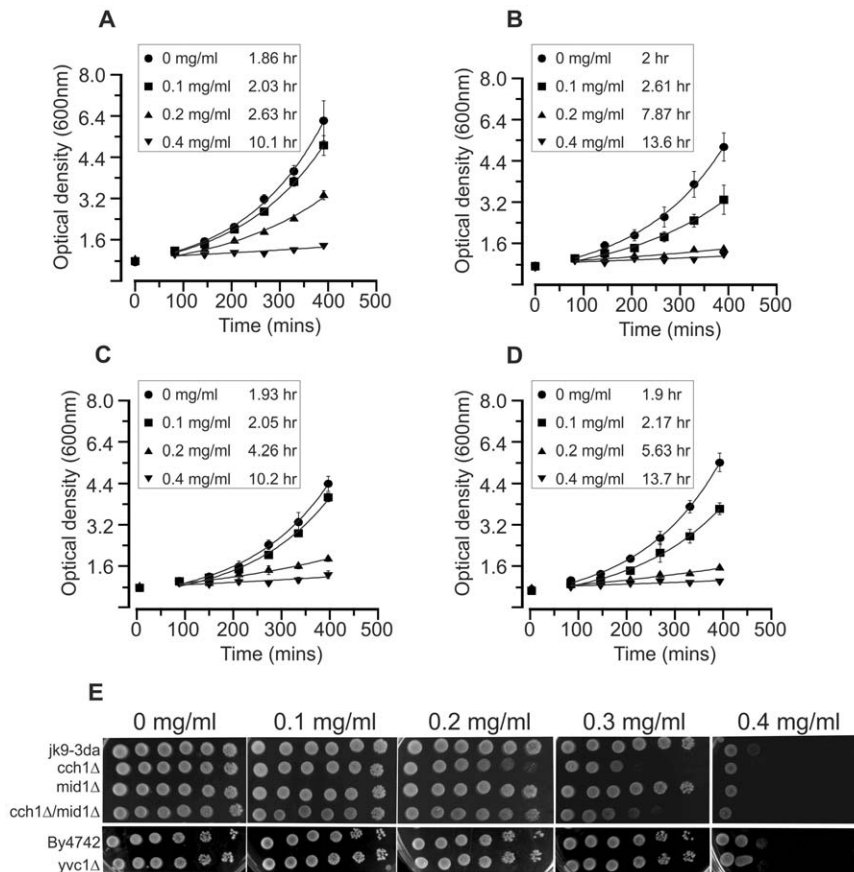

**Figure 6. CCH1 is necessary for eugenol tolerance.** Growth of JK9-3da (A), *cch1Δ* (B), *mid1Δ* (C) and *cch1Δmid1Δ* (D) yeast in response to increasing concentrations of eugenol. Growth was in liquid SCM at 30°C (shaking at 150 rpm). Doubling times are shown in boxes for each strain. Doubling times were calculated from fits of the data in the exponential phase of growth. Fits are to number of cells ( $OD_{600\text{ nm}} = OD_{600\text{ nm}}$  at time 90 minutes  $\times e^{(\text{growth rate} \times \text{time})}$ ) were growth rate is the number of doublings per minute. Data are the mean ( $\pm$  SD) of at least three independent experiments. E) Yeast culture was spotted onto SCM agar plates containing 0 (1% ethanol), 0.1, 0.2, 0.3 and 0.4 mg/ml eugenol. Left most spots on each plate are growth after 3 days at 30°C after inoculation with 5  $\mu$ l culture at approximately  $0.5 \times 10^8$  cells/ml. Serial 10-fold dilution of the first inocula are shown to the right. doi:10.1371/journal.pone.0043989.g006

support the notion that Mid1p and Cch1p are subunits of the same channel. The dependency of Cch1p function on Mid1p has also been shown in electrophysiological experiments [12] in which heterologously-expressed Cch1p activity was only apparent with the co-expression of Mid1p. However, the present study shows that Cch1p can function independently of Mid1p which has been also reported in *S. cerevisiae* in response to temperature and ion stress [24]. In addition, *Candida albicans* MID1 appears to play a more prominent role in thigmotaxis while CCH1 was more important for galvanotaxis [25]. Thus it appears that under certain conditions, Cch1p and Mid1p can function independently.

### Insights into eugenol tolerance

In the present study, actively growing cells are inhibited by eugenol (Figure 6) and hence the  $Ca^{2+}$  response to eugenol in yeast cells in logarithmic growth phase is of most interest when considering the antifungal activity of eugenol. Clearly CCH1 plays a role in eugenol tolerance. *Cch1Δ* mutants exhibit hypersensitive growth to eugenol and this correlates with a reduction in  $Ca^{2+}_{\text{cyt}}$  elevation indicating that the Cch1p-mediated  $Ca^{2+}$  influx is probably part of a signal response to protect the cells during eugenol stress. Interestingly, addition of 2  $\mu$ g/ml of FK506 had no effect on the growth of JK9-3da or *cch1Δ* strains in the

presence of eugenol (experiments conducted as for Figure 1A; data not shown) indicating that the eugenol response signal does not involve the activation of calcineurin. The mechanism for Cch1p activation by eugenol is currently unknown. It is notable that the Cch1p-mediated  $Ca^{2+}$  elevation is activated immediately following addition of eugenol and thus raises the possibility that Cch1p is directly activated by eugenol. However, eugenol has been shown to generate reactive oxygen species (ROS) in animal cells [28] and ROS (namely  $H_2O_2$ ) induces  $Ca^{2+}$  elevations in yeast [29,30]. Thus it will be interesting in future studies to elucidate the activation of Cch1p by eugenol in more detail and determine if eugenol activates Cch1p via the generation ROS. From the present study, it is apparent that eugenol-induced Cch1p activity is not dependent on Mid1p.  $\gamma$ -subunits are known to bind and regulate Cch1-like  $\alpha$ -subunits of voltage-gated calcium channels in animal cells. Recently, a  $\gamma$ -subunit homolog, Ecm7p, has been identified in *S. cerevisiae* which appears to regulate Cch1p-mediated  $Ca^{2+}$  influx [31]. Thus, it will be interesting to determine if eugenol activation of Cch1p in yeast is also dependent on Ecm7p.

It is also noteworthy that the elevation of  $Ca^{2+}_{\text{cyt}}$  is unlikely to represent a toxic  $Ca^{2+}$  burst resulting in cell death. For example, there is no correlation between the inhibition of growth in different yeast strains and the magnitude of  $Ca^{2+}_{\text{cyt}}$  increase induced by

eugenol. It is also noteworthy that the concentration of eugenol required to inhibit yeast growth (0.2 to 0.4 mg/ml) overlapped with modest increases in  $\text{Ca}^{2+}_{\text{cyt}}$  (consistent with the  $\text{Ca}^{2+}$  elevations representing a cytosolic signal) and were below that required to induce large  $\text{Ca}^{2+}_{\text{cyt}}$  elevations (which are more likely to represent a toxic burst of  $\text{Ca}^{2+}$ ).

The antifungal mechanism of eugenol appears to be distinct to that reported for amiodarone, azoles and carvacrol. Amiodarone toxicity in yeast has been extensively studied and most lines of evidence points towards a drug-induced calcium influx which constitutes a toxic  $\text{Ca}^{2+}$  burst [13,27]. Notably, the amiodarone induced  $\text{Ca}^{2+}$  influx does not appear to involve Cch1p or Mid1p [13; however also see 17] but rather the  $\text{Ca}^{2+}$  influx results from  $\text{Ca}^{2+}$  channels (of unknown molecular identity) which are activated by amiodarone-induced membrane hyperpolarisation [27]. Furthermore, in contrast to eugenol, amiodarone and azole tolerance is dependent on calcineurin [15,26]. Much less is known about the mechanisms mediating carvacrol toxicity, however based on the similarities between the transcriptional response to

amiodarone and carvacrol, Rao et al. [5] proposed that carvacrol elicits  $\text{Ca}^{2+}$  stress and  $\text{Ca}^{2+}$ -mediated cell death. It would therefore be interesting to test the sensitivity of *ch1Δ* and *mid1Δ* mutant growth to carvacrol.

Future studies should focus on elucidating the signalling pathway (downstream of the  $\text{Ca}^{2+}$  signal) conferring eugenol tolerance in yeast. It will also be interesting to identify the channel(s) mediating Cch1p-independent  $\text{Ca}^{2+}$  influx in response to eugenol and determine if these channels contribute to eugenol tolerance. This will improve our understanding of eugenol toxicity which should lead to better exploitation of eugenol in antifungal therapies.

## Author Contributions

Conceived and designed the experiments: SKR. Performed the experiments: SKR LW. Analyzed the data: SKR MM. Contributed reagents/materials/analysis tools: SKR. Wrote the paper: SKR MM.

## References

- Monk BC, Goffeau A (2008) Outwitting multidrug resistance to antifungals. *Science* 321: 367–369.
- Bakkali F, Averbeck S, Averbeck D, Waoum M (2008) Biological effects of essential oils - A review. *Food and Chemical Toxicology* 46: 446–475.
- Ahmad A, Khan A, Khan LA, Manzoor N (2010) In vitro synergy of eugenol and methyleugenol with fluconazole against clinical *Candida* isolates. *Journal of Medical Microbiology* 59: 1178–1184.
- Zore GB, Thakre AD, Jadhav S, Karuppaiyl SM (2011) Terpenoids inhibit *Candida albicans* growth by affecting membrane integrity and arrest of cell cycle. *Phytomedicine* 18: 1181–1190.
- Rao A, Zhang YQ, Muend S, Rao R (2010) Mechanism of Antifungal Activity of Terpenoid Phenols Resembles Calcium Stress and Inhibition of the TOR Pathway. *Antimicrobial Agents and Chemotherapy* 54: 5062–5069.
- Fischer M, Schnell N, Chattaway J, Davies P, Dixon G, et al. (1997) The *Saccharomyces cerevisiae* CCH1 gene is involved in calcium influx and mating. *Febs Letters* 419: 259–262.
- Gietz D, Woods RA (1998) Transformation of yeast by the lithium acetate single-stranded carrier DNA/PEG method. *Yeast Gene Analysis* 26: 53–66.
- Batiza AF, Schulz T, Masson PH (1996) Yeast respond to hypotonic shock with a calcium pulse. *J Biol Chem* 271: 23357–23362.
- Loukin S, Zhou XL, Kung C, Saimi Y (2008) A genome-wide survey suggests an osmoprotective role for vacuolar  $\text{Ca}^{2+}$  release in cell wall-compromised yeast. *Faseb Journal* 22: 2405–2415.
- Iida H, Nakamura H, Ono T, Okumura MS, Anraku Y (1994) MID1, a novel *Saccharomyces cerevisiae* gene encoding a plasma membrane protein required for  $\text{Ca}^{2+}$  influx and mating. *Molecular and Cellular Biology* 14: 8259–8271.
- Locke EG, Bonilla M, Liang L, Takita Y, Cunningham KW (2000) A homolog of voltage-gated  $\text{Ca}^{2+}$  channels stimulated by depletion of secretory  $\text{Ca}^{2+}$  in yeast. *Molecular and Cellular Biology* 20: 6686–6694.
- Hong MP, Vu K, Bautos J, Gelli A (2010) Cch1 Restores Intracellular  $\text{Ca}^{2+}$  in Fungal Cells during Endoplasmic Reticulum Stress. *J Biol Chem* 285: 10951–10958.
- Muend S, Rao R (2008) Fungicidal activity of amiodarone is tightly coupled to calcium influx. *Fems Yeast Research* 8: 425–431.
- Loukin SH, Su ZW, Kung C (2009) Hypotonic shocks activate rat TRPV4 in yeast in the absence of polyunsaturated fatty acids. *Febs Letters* 583: 754–758.
- Sen Gupta S, Ton VK, Beaudry V, Rulli S, Cunningham K, et al. (2003) Antifungal activity of amiodarone is mediated by disruption of calcium homeostasis. *J Biol Chem* 278: 28831–28839.
- Loukin SH, Kung C, Saimi Y (2007) Lipid perturbations sensitize osmotic down-shock activated  $\text{Ca}^{2+}$  influx, a yeast “deletome” analysis. *FASEB J* 21: 1813–1820.
- Courchesne WE, Ozturk S (2003) Amiodarone induces a caffeine-inhibited, MID1-dependent rise in free cytoplasmic calcium in *Saccharomyces cerevisiae*. *Molecular Microbiology* 47: 223–234.
- Palmer CP, Zhou XL, Lin JY, Loukin SH, Kung C, et al. (2001) A TRP homolog in *Saccharomyces cerevisiae* forms an intracellular  $\text{Ca}^{2+}$ -permeable channel in the yeast vacuolar membrane. *Proceedings Of The National Academy Of Sciences Of The United States Of America* 98: 7801–7805.
- Bonilla M, Nastase KK, Cunningham KW (2002) Essential role of calcineurin in response to endoplasmic reticulum stress. *Embo Journal* 21: 2343–2353.
- Denis V, Cyert MS (2002) Internal  $\text{Ca}^{2+}$  release in yeast is triggered by hypertonic shock and mediated by a TRP channel homologue. *Journal Of Cell Biology* 156: 29–34.
- Peiter E, Fischer M, Sidaway K, Roberts SK, Sanders D (2005) The *Saccharomyces cerevisiae*  $\text{Ca}^{2+}$  channel Cch1pMid1p is essential for tolerance to cold stress and iron toxicity. *Febs Letters* 579: 5697–5703.
- Kaur R, Castano I, Cormack BP (2004) Functional genomic analysis of fluconazole susceptibility in the pathogenic yeast *Candida glabrata*: Roles of calcium signaling and mitochondria. *Antimicrobial Agents and Chemotherapy* 48: 1600–1613.
- Reedy JL, Filler SG, Heitman J (2010) Elucidating the *Candida albicans* calcineurin signaling cascade controlling stress response and virulence. *Fungal Genetics And Biology* 47: 107–116.
- Liu M, Du P, Heinrich G, Cox GM, Gelli A (2006) Cch1 mediates calcium entry in *Cryptococcus neoformans* and is essential in low-calcium environments. *Eukaryotic Cell* 5: 1788–1796.
- Brand A, Shanks S, Duncan VMS, Yang M, Mackenzie K, et al. (2007) Hyphal orientation of *Candida albicans* is regulated by a calcium-dependent mechanism. *Current Biology* 17: 347–352.
- Edlind T, Smith L, Henry K, Katiyar S, Nickels J (2002) Antifungal activity in *Saccharomyces cerevisiae* is modulated by calcium signalling. *Molecular Microbiology* 46: 257–268.
- Maresova L, Muend S, Zhang YQ, Sychrova H, Rao R (2009) Membrane Hyperpolarization Drives Cation Influx and Fungicidal Activity of Amiodarone. *J Biol Chem* 284: 2795–2802.
- Yoo CB, Han KT, Cho KS, Ha J, Park HJ, et al. (2005) Eugenol isolated from the essential oil of *Eugenia caryophyllata* induces a reactive oxygen species-mediated apoptosis in HL-60 human promyelocytic leukemia cells. *Cancer Letters* 225: 41–52.
- Pinontoan R, Krystofova S, Kawano T, Mori IC, Tsuji FI, et al. (2002) Phenylethylamine induces an increase in cytosolic  $\text{Ca}^{2+}$  in yeast. *Bioscience Biotechnology and Biochemistry* 66: 1069–1074.
- Popa CV, Dumitru I, Ruta LL, Danet AF, Farcasanu IC (2010) Exogenous oxidative stress induces  $\text{Ca}^{2+}$ -release in the yeast *Saccharomyces cerevisiae*. *Febs Journal* 277: 4027–4038.
- Martin DC, Kim H, Mackin NA, Maldonado-Baez L, Evangelista CC, et al. (2011) New Regulators of a High Affinity  $\text{Ca}^{2+}$  Influx System Revealed through a Genome-wide Screen in Yeast. *J Biol Chem* 286: 10744–10754.
